# Supplementary material for: An FeP@C nanoarray vertically grown on graphene nanosheets: an ultrastable Li-ion battery anode with pseudocapacitance-boosted electrochemical kinetics
Source: Royal Society of Chemistry journal article supplement (doi:10.1039/c8nr08849g), 2018-12-18
Supplement: c8nr08849g1.pdf [file c8nr08849g1.pdf]

## Electronic Supplementary Information (ESI)

### FeP@C Nanoarray Vertically Grown on Graphene Nanosheets: An Ultrastable Li-Ion Battery Anode with Pseudocapacitance-boosted Electrochemical Kinetics

Bao-Hua Hou,<sup>a</sup> Ying-Ying Wang,<sup>b</sup> Qiu-Li Ning,<sup>a</sup> Chao-Ying Fan,<sup>c</sup> Xiao-Tong Xi,<sup>a</sup> Xu Yang,<sup>a</sup> Jiawei Wang,<sup>\*d</sup> Jing-Ping Zhang,<sup>a</sup> Xinlong Wang,<sup>\*a</sup> Xing-Long Wu<sup>\*a,c</sup>

<sup>a</sup> National & Local United Engineering Laboratory for Power Batteries, Faculty of Chemistry, Northeast Normal University, Changchun, Jilin 130024, P. R. China.

<sup>b</sup> Collaborative Innovation Center of Advanced Energy Materials, School of Materials and Energy, Guangdong University of Technology, Guangzhou 510006, China.

<sup>c</sup> Key Laboratory for UV Light-Emitting Materials and Technology, Northeast Normal University, Ministry of Education, Changchun, Jilin 130024, P. R. China.

<sup>d</sup> State Key Laboratory of Electroanalytical Chemistry, Changchun Institute of Applied Chemistry, Chinese Academy of Sciences, Changchun, Jilin 130022, P. R. China

#### \*Corresponding Author

E-mail address: xinglong@nenu.edu.cn (X.-L. Wu)

#### Calculation process of TGA

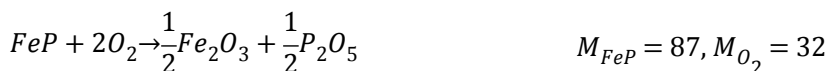

For U-FP@C:

$$m_{FeP1} + 2 * \frac{m_{FeP1}}{M_{FeP}} * M_{O_2} = 131\%$$

$$m_{FeP1} = 75\%$$

$$m_{C1} = 1 - m_{FeP1} = 25\%$$

For G⊥FP@C-NA:

$$m_{FeP2} + 2 * \frac{m_{FeP2}}{M_{FeP}} * M_{O_2} = 119\%$$

$$m_{FeP2} = 69\%$$

$$m_{C2} = m_{FeP2} \frac{m_{C1}}{m_{FeP1}} = 23\%$$

$$m_G = 1 - m_{FeP2} - m_{C2} = 8\%$$

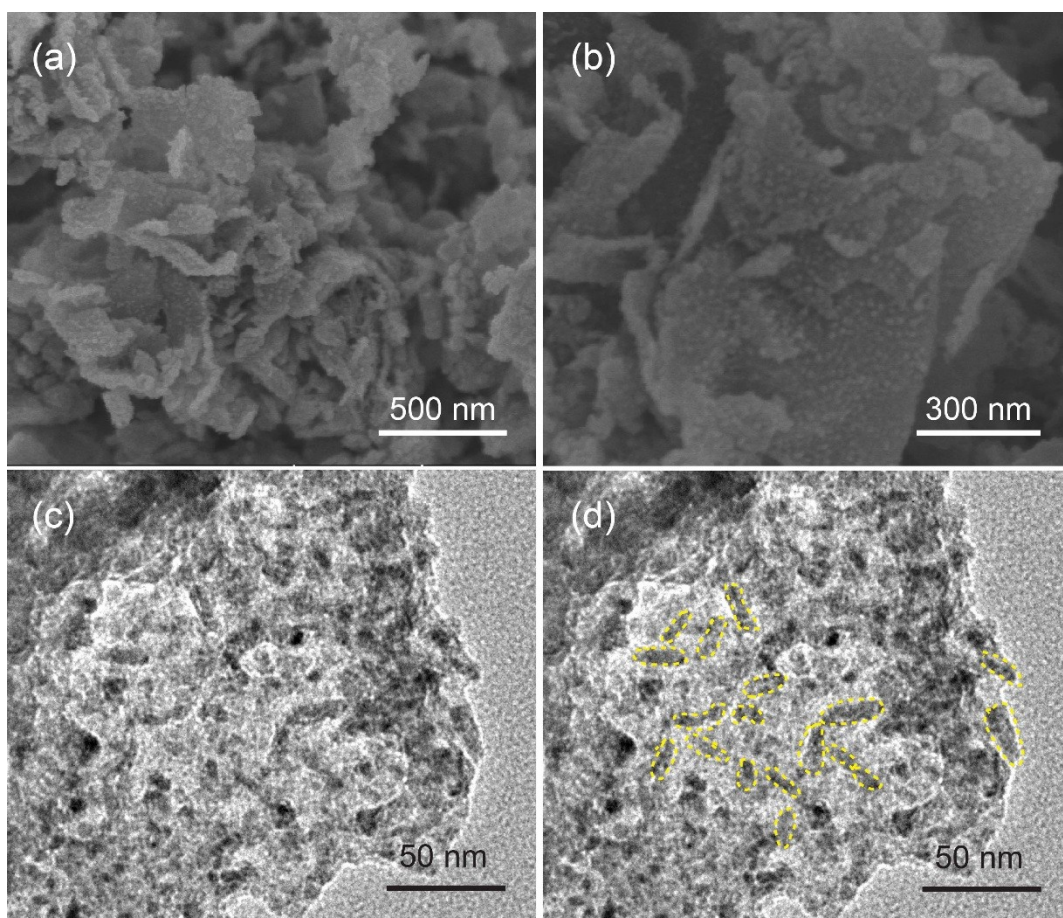

**Figure S1.** (a, b) The SEM images of G⊥FP@C-NA with different scale. (c, d) The TEM images of G⊥FP@C-NA, and the yellow line marks the FeP nanorods.

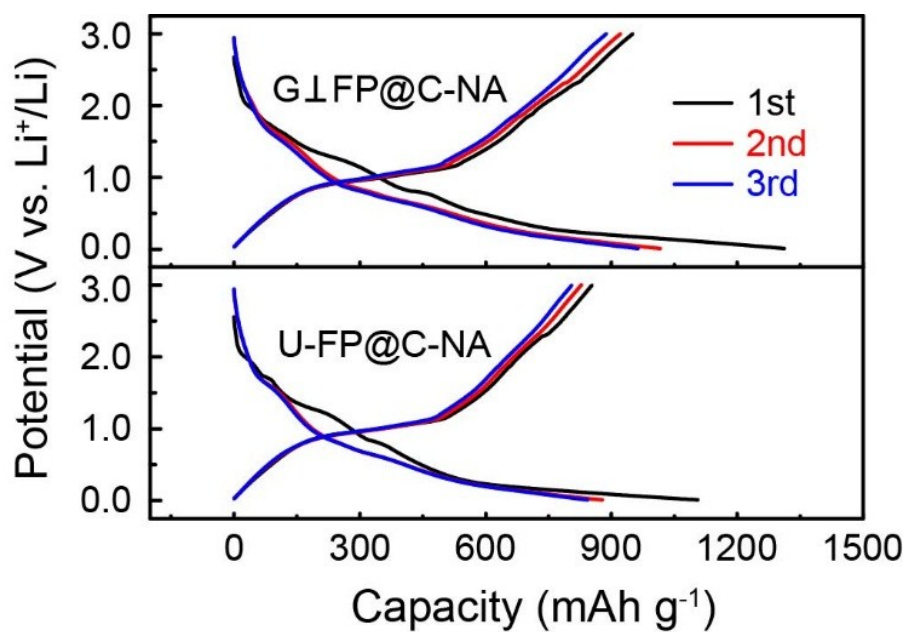

**Figure S2.** The charge and discharge curves of the initial three cycles at 50 mAh g<sup>-1</sup> for G⊥FP@C-NA and U-FP@C.

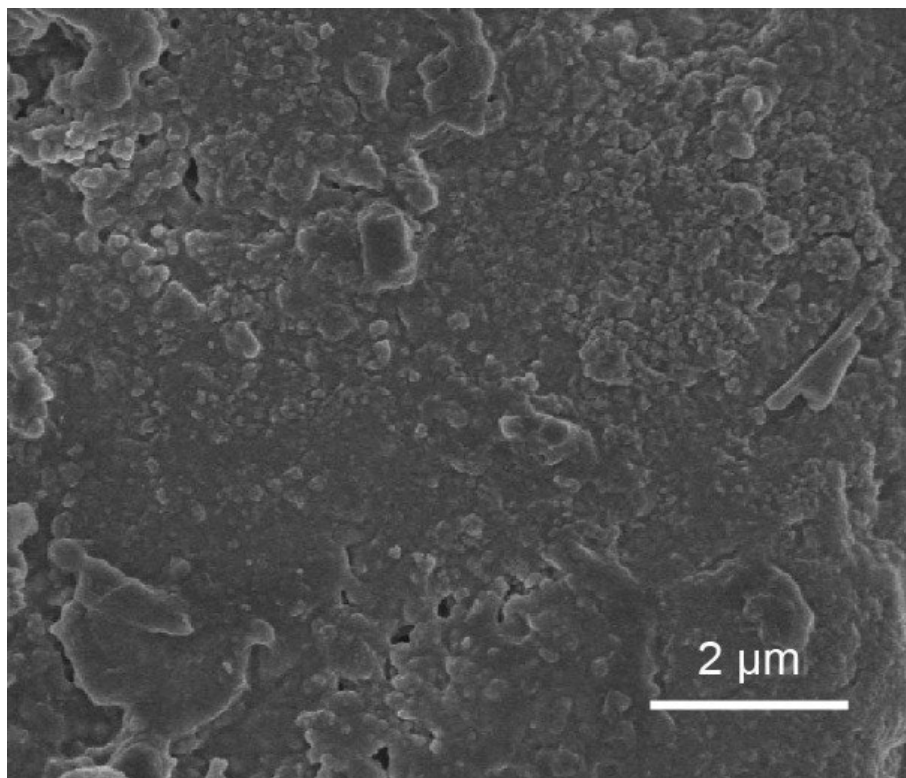

**Figure S3.** SEM images on the surface of G⊥FP@C-NA electrode after 100 cycles at 500 mA g<sup>-1</sup>.

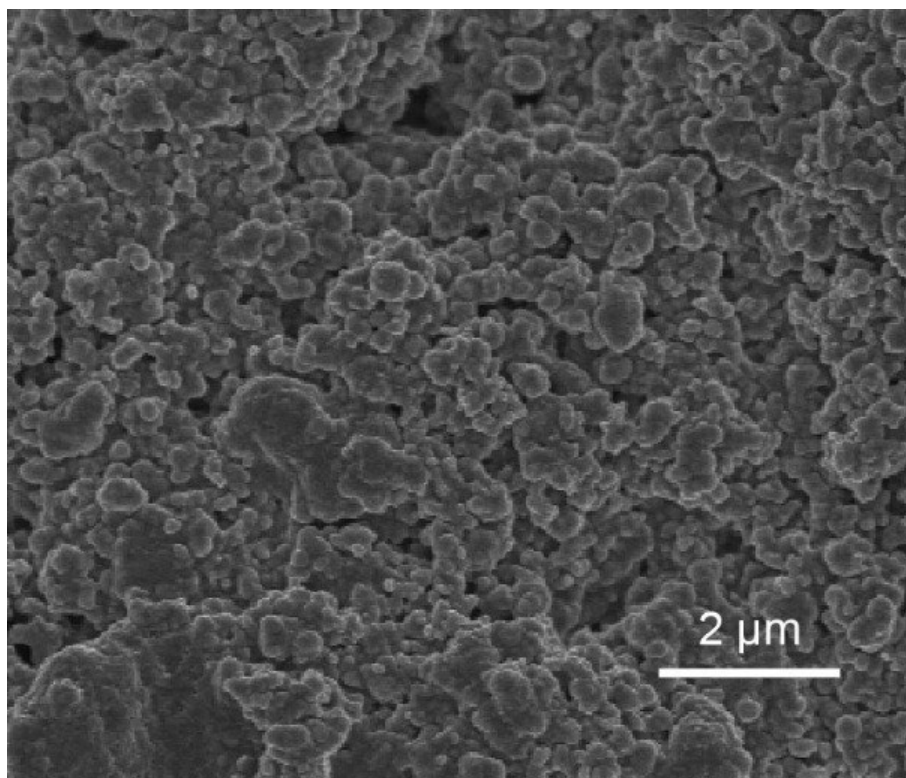

**Figure S4.** SEM images on the surface of U-FP@C electrode after 100 cycles at 500 mA g<sup>-1</sup>.

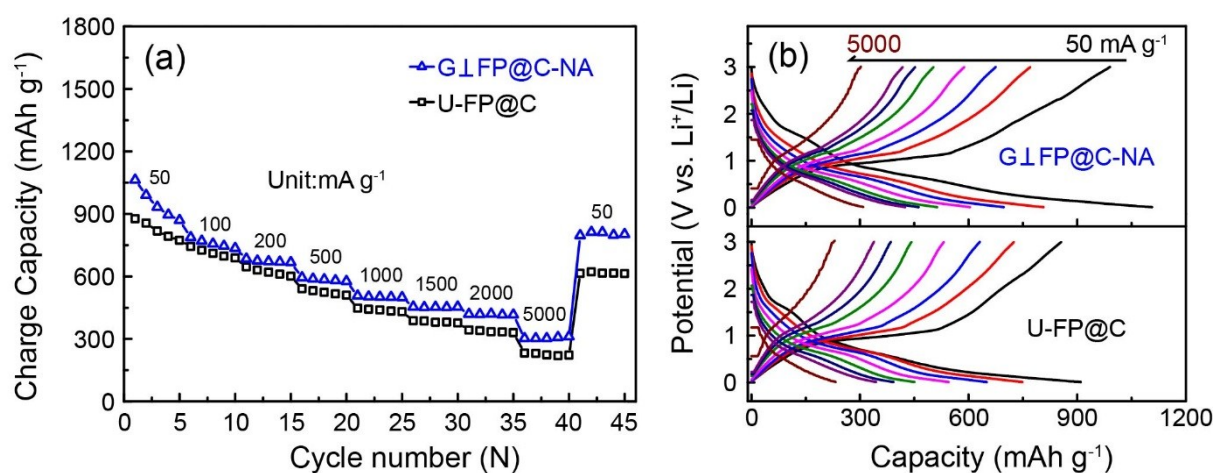

**Figure S5.** (a) Rate performance and (b) charge and discharge curves at different current densities of G⊥FP@C-NA and U-FP@C without the active process.

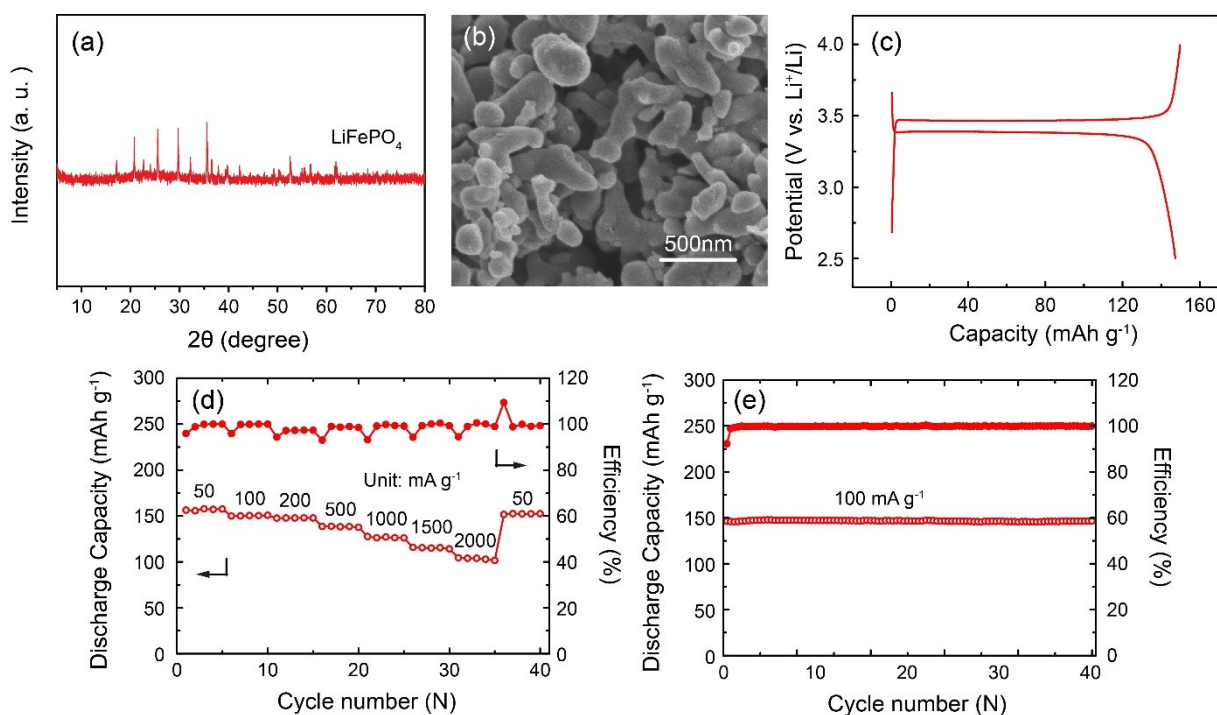

**Figure S6.** (a) XRD pattern, (b) SEM image, (c) GCD curves, rate performance and cycling stability of LiFePO<sub>4</sub>.

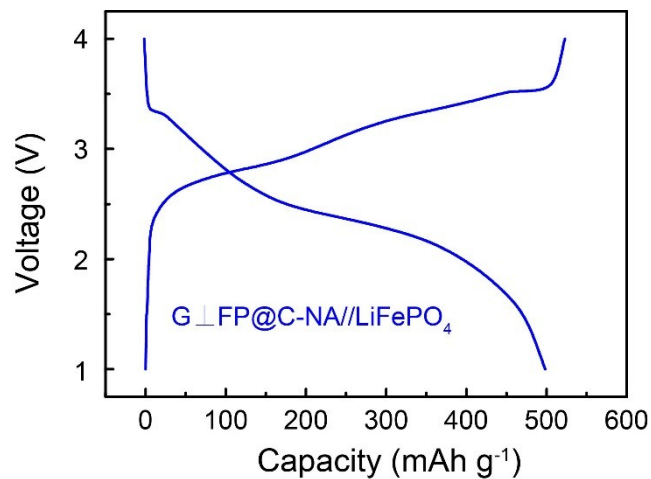

**Figure S7.** GCD curves of  $G \perp FP@C-NA//LiFePO_4$  full cell.

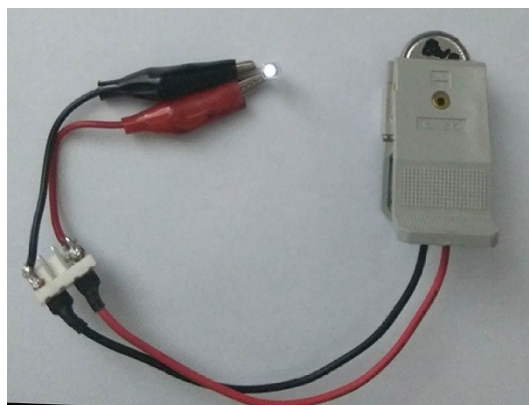

**Figure S8.** A photograph shows that the full battery can light up a LED bulb.

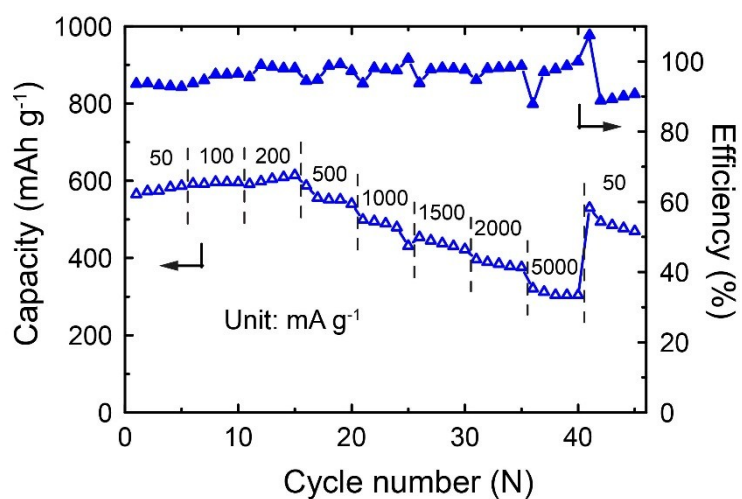

**Figure S9.** Rate performance of  $G \perp FP@C-NA//LiFePO_4$  full cell.

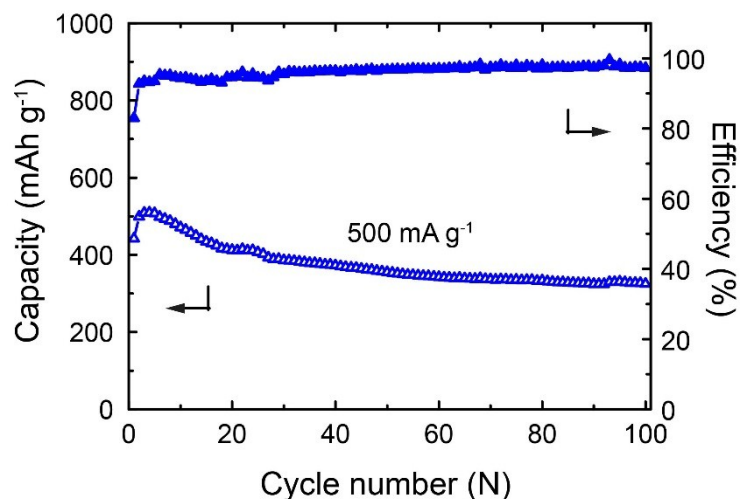

**Figure S10.** Cycling stability of G ⊥ FP@C-NA//LiFePO<sub>4</sub> full cell.

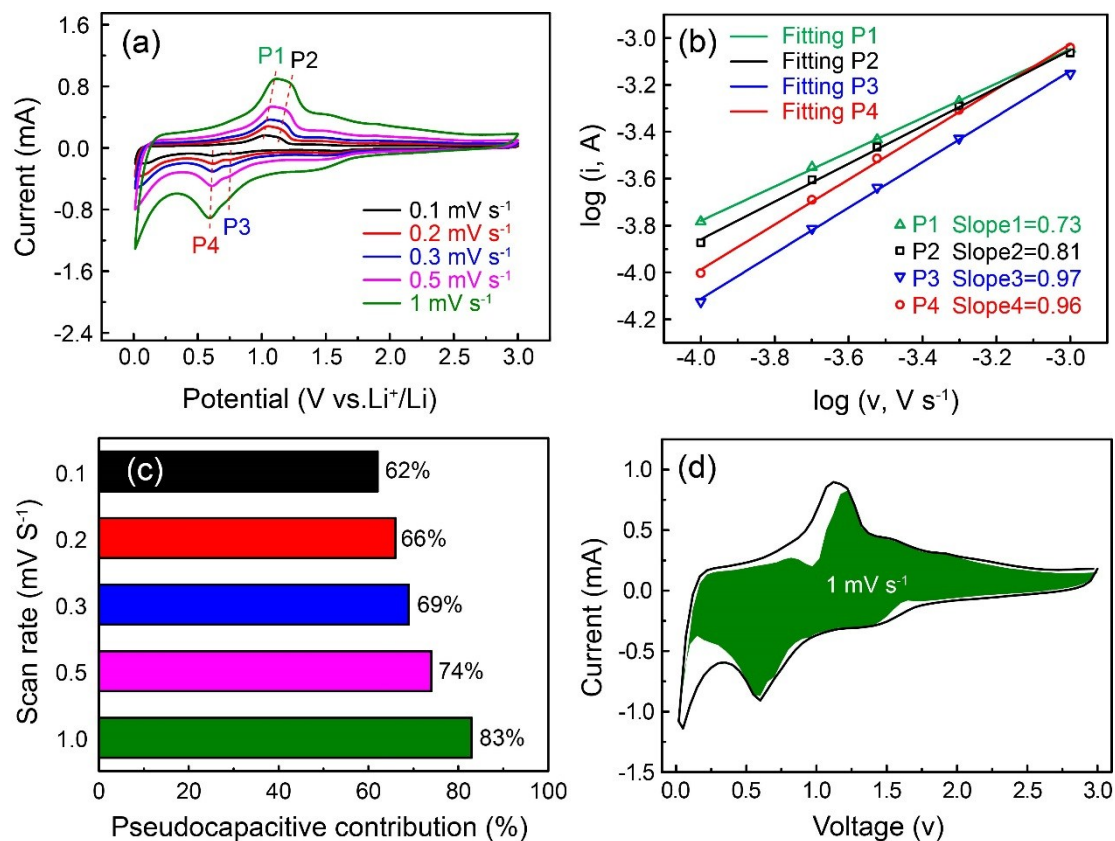

**Figure S11.** (a) CV curves at different scan rate, (b) log(i) versus log(v) plot, and (c) the pseudocapacitive contribution at different scan rates and (d) CV curve with the pseudocapacitive fraction at a scan rate of 1 mV s<sup>-1</sup> of U-FP@C.

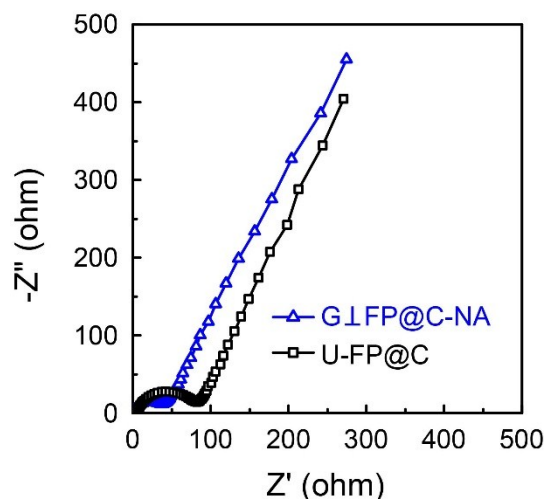

**Figure S12.** Nyquist plots of G ⊥ FP@C-NA and U-FP@C from 1 MHz to 0.1 Hz.

**Table S1.** The comparison of the cycling stability between the present G ⊥ FP@C-NA and other FeP-based anode materials previously reported in recent years.

| Numbers          | Samples                     | Coulombic Efficiency (1 <sup>st</sup> cycle) | Current density (mA g <sup>-1</sup> ) | Capacity (1 <sup>st</sup> cycle) (mAh g <sup>-1</sup> ) | Cycle numbers (n) | Capacity after cycle (mAh g <sup>-1</sup> ) | Capacity decay rate per cycle |
|------------------|-----------------------------|----------------------------------------------|---------------------------------------|---------------------------------------------------------|-------------------|---------------------------------------------|-------------------------------|
| 1                | G/FeP                       | 71.60%                                       | 500                                   | 768.2                                                   | 500               | 1009                                        | -0.06%                        |
|                  |                             |                                              | 2000                                  | 506.5                                                   | 1300              | 355.9                                       | 0.02%                         |
| 2 <sup>[1]</sup> | H-FeP@C@GR                  | 74%                                          | 200                                   | 1154                                                    | 100               | 771                                         | 0.33%                         |
|                  |                             |                                              | 500                                   | 885                                                     | 300               | 542                                         | 0.13%                         |
| 3 <sup>[2]</sup> | FeP@rGO                     | 73%                                          | 100                                   | 1180                                                    | 100               | 997                                         | 0.16%                         |
|                  |                             |                                              | 1000                                  | 475                                                     | 400               | 470                                         | 0.00%                         |
| 4 <sup>[3]</sup> | FeP                         | 58.1%                                        | 100                                   | 575                                                     | 50                | 334                                         | 0.84%                         |
| 5 <sup>[4]</sup> | FeP@C                       | 70%                                          | 200                                   | 720                                                     | 100               | 720                                         | 0.00%                         |
|                  |                             |                                              | 500                                   | 610                                                     | 400               | 610                                         | 0.00%                         |
| 6 <sup>[5]</sup> | Mesoporous FeP              | 49%                                          | 144                                   | 390                                                     | 30                | 355                                         | 0.30%                         |
| 7 <sup>[6]</sup> | Nanorod-FeP@C               | 28.10%                                       | 30                                    | 277                                                     | 200               | 480                                         | -0.37%                        |
| 8 <sup>[7]</sup> | Nanoscaled FeP <sub>y</sub> | 75%                                          | 20                                    | 1486                                                    | 10                | 1089                                        | 2.67%                         |
|                  |                             |                                              | 60                                    | 908                                                     | 10                | 581                                         | 3.60%                         |
| 9 <sup>[8]</sup> | FeP <sub>2</sub> -amorphous | 61%                                          | 0.1C                                  | 766                                                     | 10                | 882                                         | -1.51%                        |
|                  |                             |                                              | 0.2C                                  | 310                                                     | 100               | 300                                         | 0.03%                         |

## Reference

- [1] X. Wang, K. Chen, G. Wang, X. Liu, H. Wang, *ACS Nano* **2017**, *11*, 11602.
- [2] H. Jiang, B. Chen, J. Pan, C. Li, C. Liu, L. Liu, T. Yang, W. Li, H. Li, Y. Wang, L. Chen, M. Chen, *J. Alloys Compd.* **2017**, *728*, 328.
- [3] P. S. Veluri, S. Mitra, *RSC Adv.* **2016**, *6*, 87675.
- [4] F. Han, C. Zhang, J. Yang, G. Ma, K. He, X. Li, *J. Mater. Chem. A* **2016**, *4*, 12781.
- [5] M. Pramanik, Y. Tsujimoto, V. Malgras, S. X. Dou, J. H. Kim, Y. Yamauchi, *Chemistry of Materials* **2015**, *27*, 1082.
- [6] J. Jiang, C. Wang, J. Liang, J. Zuo, Q. Yang, *Dalton Trans.* **2015**, *44*, 10297.
- [7] G. Wang, R. Zhang, T. Jiang, N. A. Chernova, Z. Dong, M. S. Whittingham, *J. Power Sources* **2014**, *270*, 248.
- [8] J. W. Hall, N. Membreno, J. Wu, H. Celio, R. A. Jones, K. J. Stevenson, *J. Am. Chem. Soc.* **2012**, *134*, 5532.
